# Supplementary material for: Transcriptomic response of durum wheat to nitrogen starvation
Source: PubMed Central journal article supplement (PMC5430780; doi:10.1038/s41598-017-01377-0), 2017-04-26
Supplement: 41598_2017_1377_MOESM1_ESM.pdf [file 41598_2017_1377_MOESM1_ESM.pdf]

## **Transcriptomic response of durum wheat to nitrogen starvation**

**Pasquale L. Curci<sup>1\*</sup>, Riccardo Aiese Cigliano<sup>2</sup>, Diana L. Zuluaga<sup>1</sup>, Michela Janni<sup>3</sup>, Walter Sanseverino<sup>2</sup>, Gabriella Sonnante<sup>1\*</sup>**

<sup>1</sup>**Institute of Biosciences and Bioresources, National Research Council (CNR), Via Amendola 165/A, 70126 Bari, Italy**

<sup>2</sup>**Sequentia Biotech SL, Calle Comte D'Urgell 240, 08036 Barcelona, Spain**

<sup>3</sup>**Institute for Electronics and Magnetism, National Research Council (CNR), Parco Area delle Scienze 37/A, 43124 Parma, Italy**

### **Corresponding authors**

Gabriella Sonnante

Institute of Biosciences and Bioresources, National Research Council (CNR)

Via Amendola 165/A, 70126 Bari, Italy

Email: [gabriella.sonnante@ibbr.cnr.it](mailto:gabriella.sonnante@ibbr.cnr.it)

Pasquale Luca Curci

Institute of Biosciences and Bioresources, National Research Council (CNR)

Via Amendola 165/A, 70126 Bari, Italy

Email: [luca.curci@ibbr.cnr.it](mailto:luca.curci@ibbr.cnr.it)

## Supplementary Table S1. Primers used for RNA-seq validation experiment

| Gene                      | Forward (5' - 3')         | Reverse (5'-3')            | Product length (bp) | Reference                     | EnsemblPlants          |
|---------------------------|---------------------------|----------------------------|---------------------|-------------------------------|------------------------|
| <i>ZIFL2</i>              | CGTCTGCTCTACCTTGCCGA      | CCTCCCATGCTTATCGGCCA       | 184                 |                               | TRAES3BF102700140CFD_g |
| <i>DOF1.3</i>             | GGTGATCCTCTCTGCACCCC      | CTGCTGCAACTCTCTCCCTCG      | 223                 |                               | Traes_4AS_86FF10C36    |
| <i>ATJ2</i>               | GAAGCTATCTCTTGCCCGCAA     | GTAACCAGCACCTTGGCAGC       | 103                 |                               | Traes_5BL_CF5A8348D    |
| <i>THIC</i>               | GACCGGAGATAGCGGGCATT      | GGGCGACTTCWGAYCGGACA       | 215                 |                               | Traes_4BS_E79CB87B7    |
| <i>Phosphate 2 (PHO2)</i> | GAGGGCTTGCAATTGTTGGGG     | CCCTCCGGATTCCACACCTC       | 219                 |                               | Traes_1BL_241A3B9EF    |
| <i>TaGS2_cino_F</i>       | GGACGATTTGAAGCCAGTGGAG    | ATGGCACTTGTAAGTGACCTTG     | 261                 |                               | Traes_2BL_342BDEA35    |
| <i>TaNPF7.1_F</i>         | CTACAAGACCTGCGCCATCTTC    | GATGAGGTATAGCCGCGAGGAG     | 82                  | Buchner and Hawkesford (2014) | Traes_6DL_0A59B823C    |
| <i>TaGDH2</i>             | AGGATGGGAGCATTACCTTGG     | GGATATAAGAACTKTCATCCACCACG | 138                 | Buchner and Hawkesford (2014) | Traes_2BL_309ED7C81    |
| <i>TaNRT2.1</i>           | GCCGCTTGCTTCCACGCA        | GTCCTTGCCATGTCTCCCTTCT     | 181                 | Taulemesse <i>et al.</i> 2015 | Traes_6DS_9184F1B4B.1  |
| <i>TaNRT1</i>             | CATGAAGGCTGGCTCTGGGGT     | GAGCTGAGGAATCACATGGCAAAC   | 190                 | Taulemesse <i>et al.</i> 2015 | Traes_4BL_985CBED5D    |
| <i>Tae-TIFY10A</i>        | GTGTCTGCAGCAGTTGTGGTC     | GGGAAGGTGCTCGTGTCAAC       | 119                 | Zhang <i>et al.</i> 2014      | Traes_2AS_A8CCC32D3    |
| <i>TaNr</i>               | GGCCAATTCYTTTCATCTCCTTCTG | TACRTSCACAGATTGATGCGTCSA   | 120                 | Buchner and Hawkesford (2014) | Traes_6AS_AB7CDF374    |
| <i>RLI(a)</i>             | TTGAGCAACTCATGGACCAG      | GCTTTCCAAGGCACAACAT        | 84                  | Gimenez <i>et al.</i> 2011    | Ta2776*                |

\* = unigene
